# Supplementary material for: Rac1 inhibition regenerates wounds in mouse fetuses via altered actin dynamics
Source: PubMed Central journal article supplement — Sci Rep. 2024 Nov 8;14:27213. doi: 10.1038/s41598-024-78395-2 (PMC11549422; doi:10.1038/s41598-024-78395-2), 2024-11-08

Figure 2b

ARP2

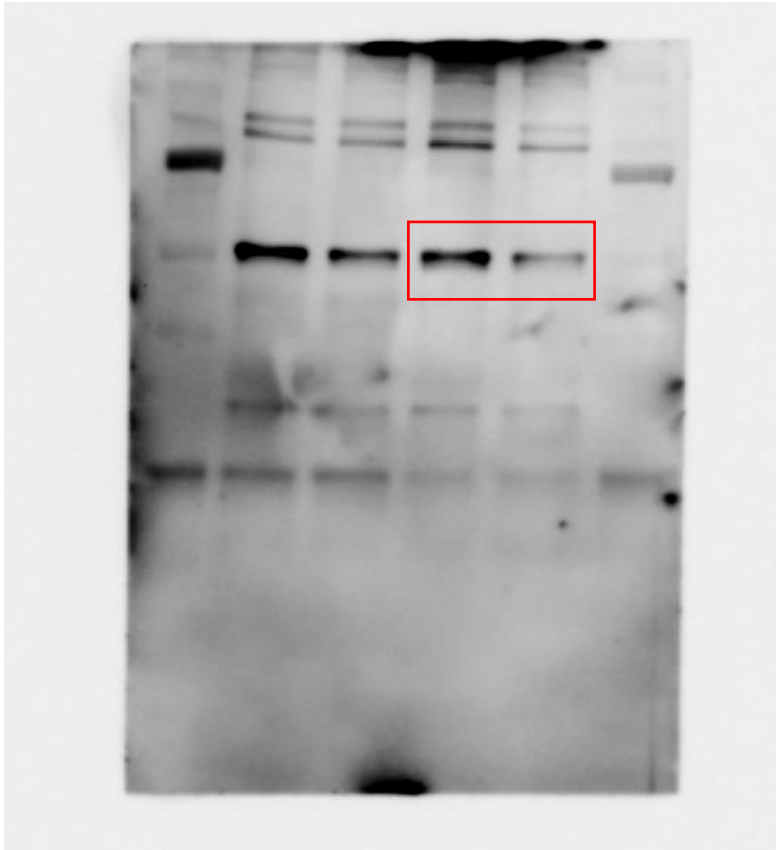

ARP3

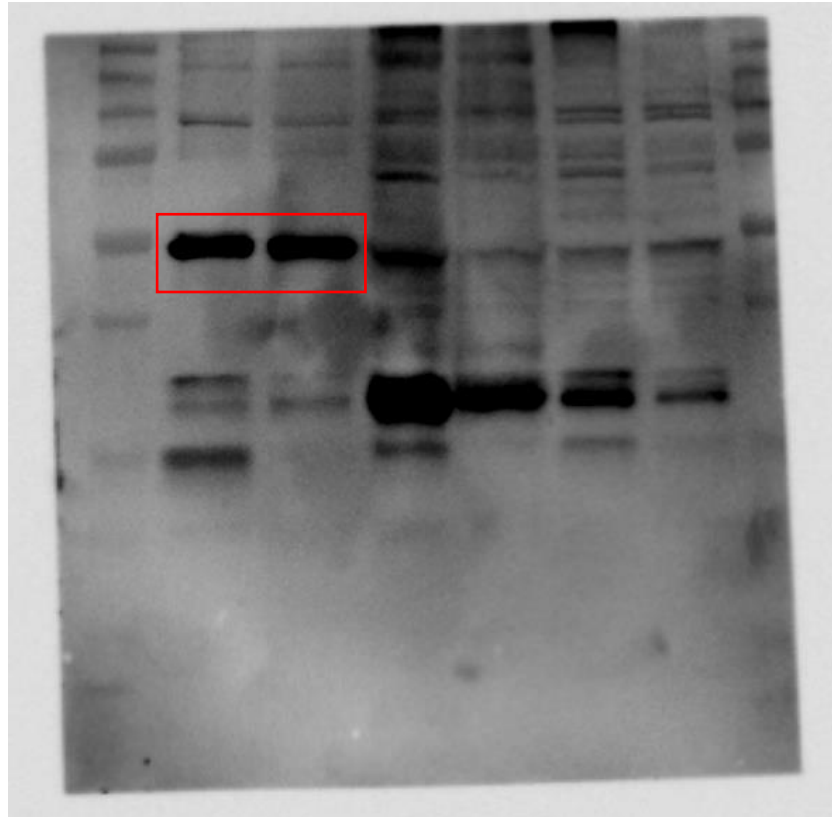

Figure 2b

RhoA

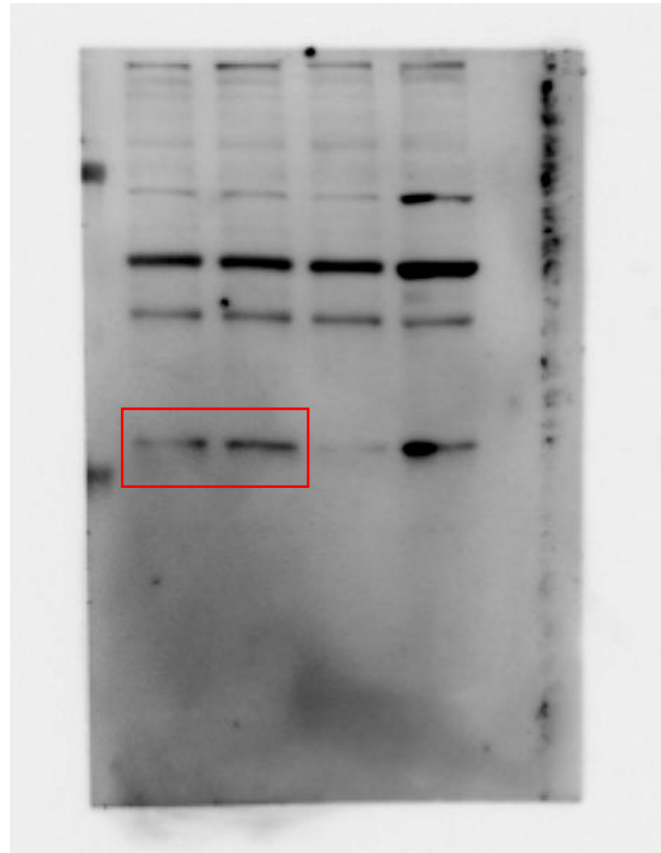

ACTB

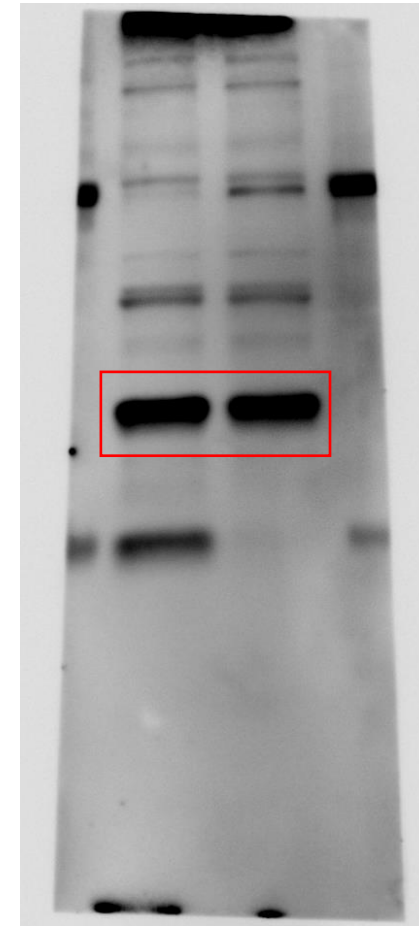

Figure 2c

Rac1-GTP

Total Rac1

ACTB

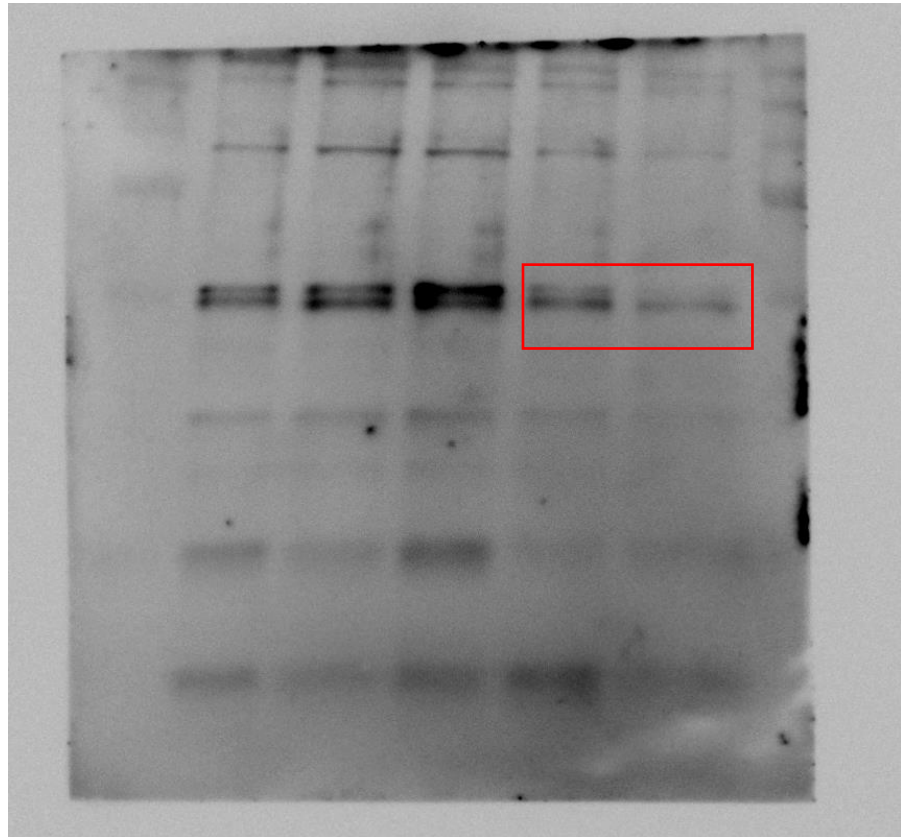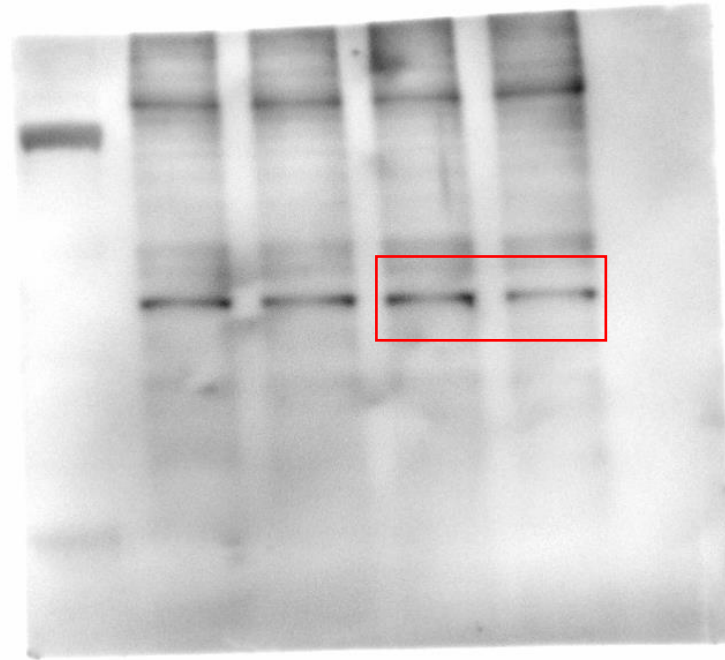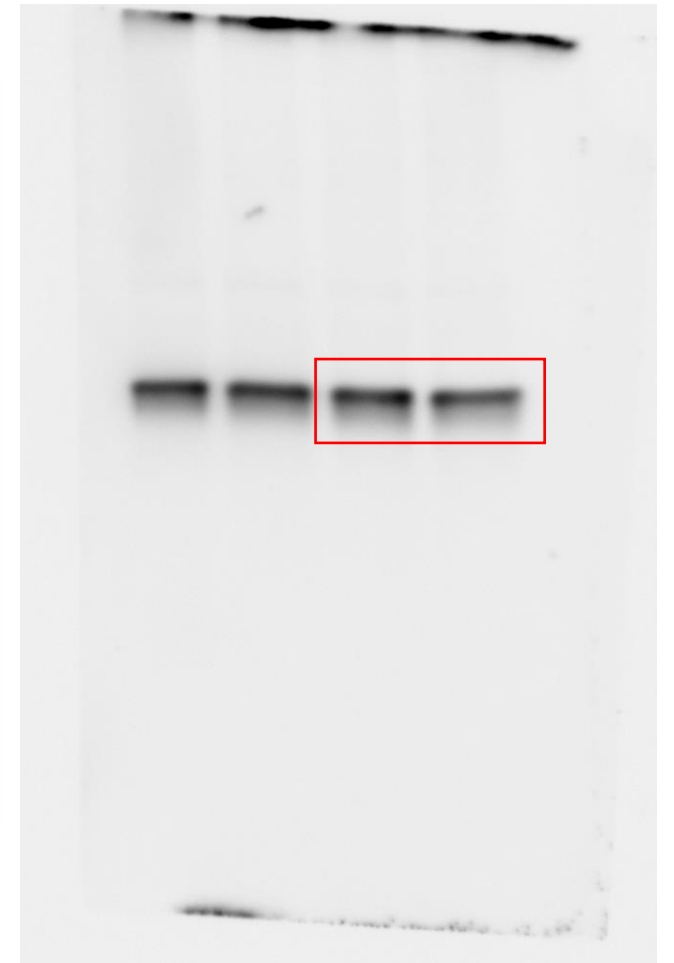

Figure 3d

Rac1-GTP

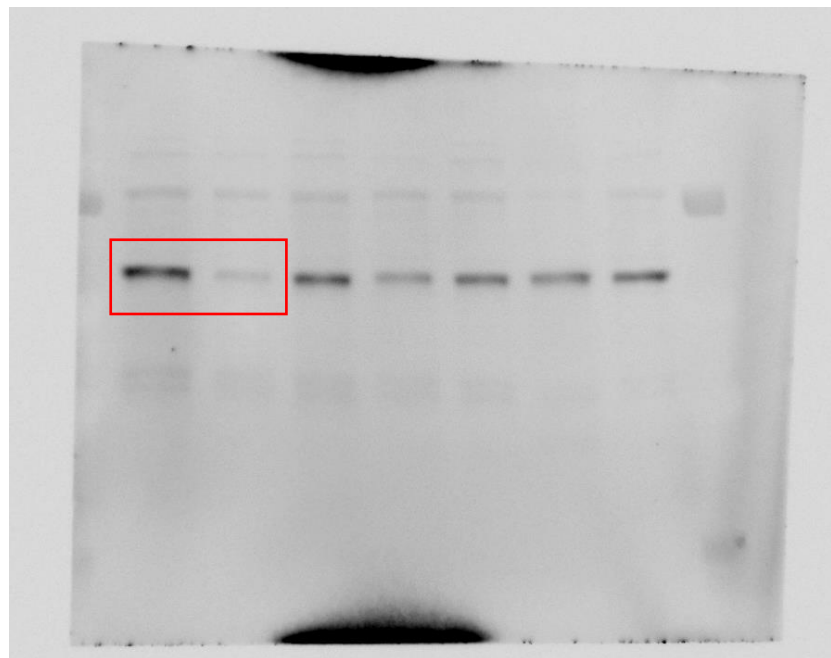

Total Rac1

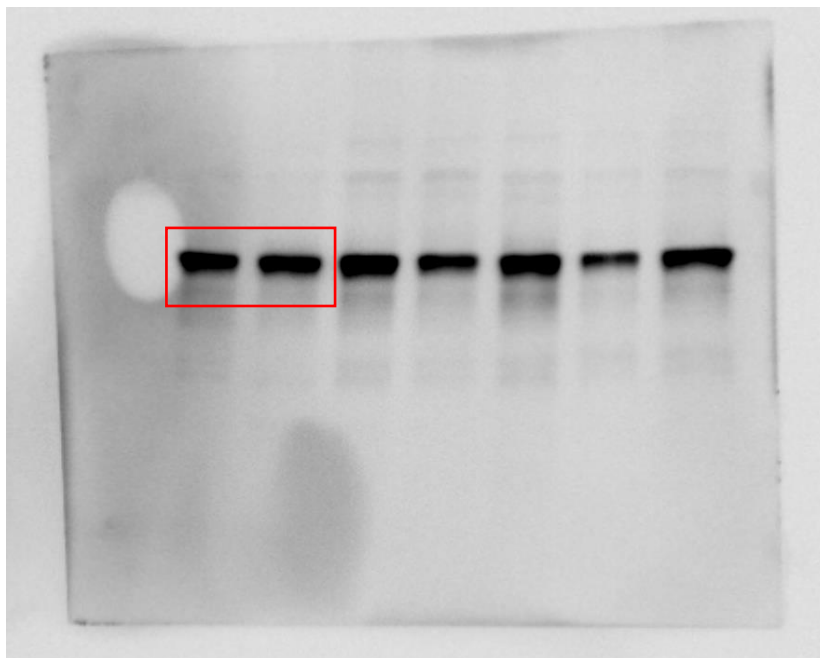

Figure 3d

ACTB

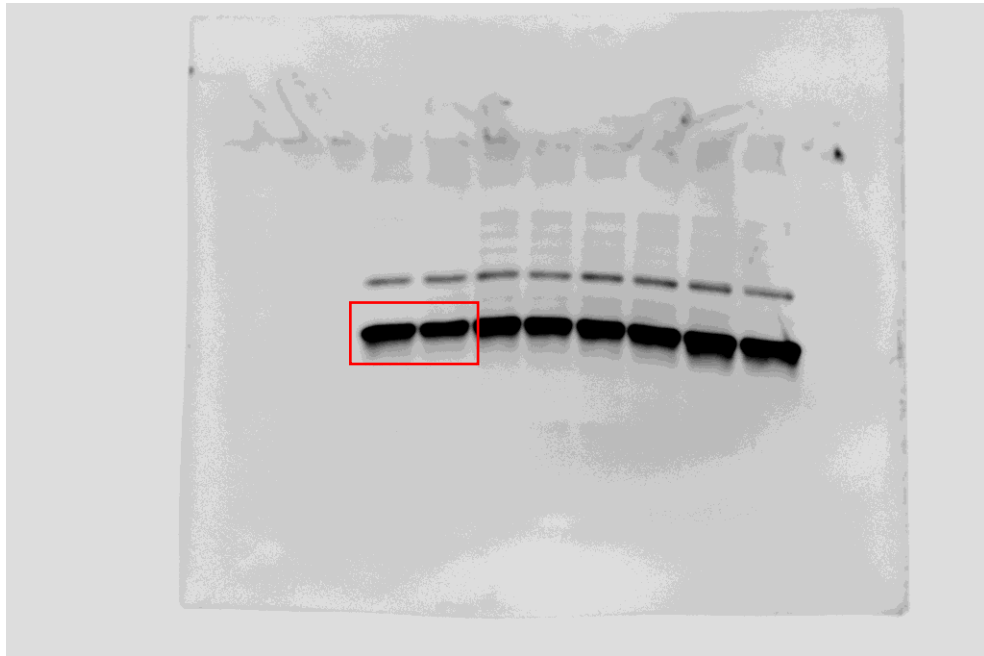

Figure 5e

ARP2

ARP3

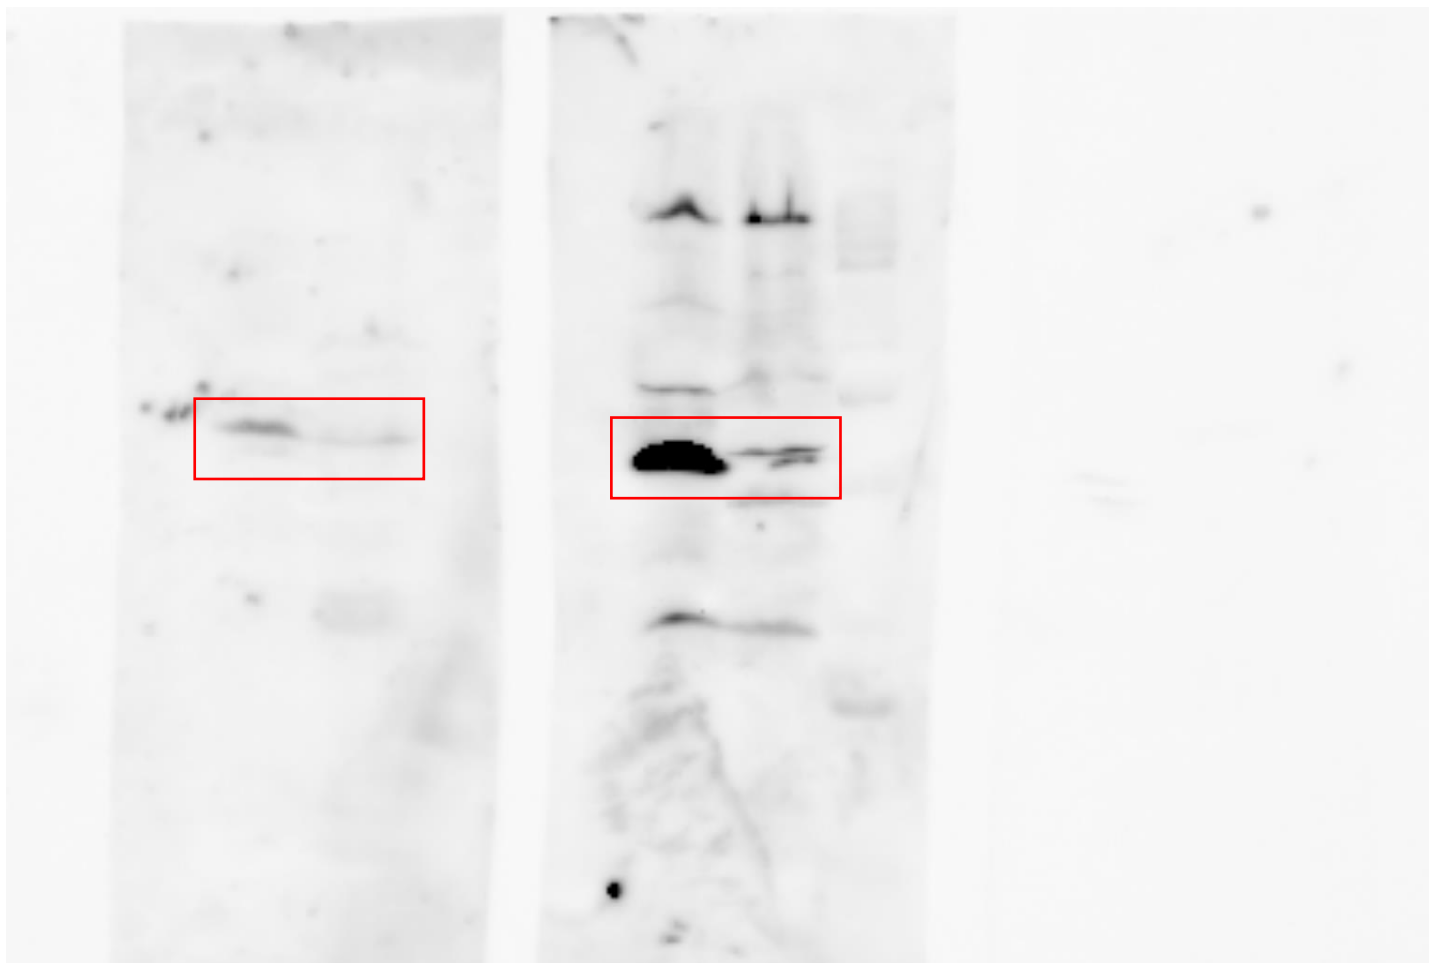

RhoA

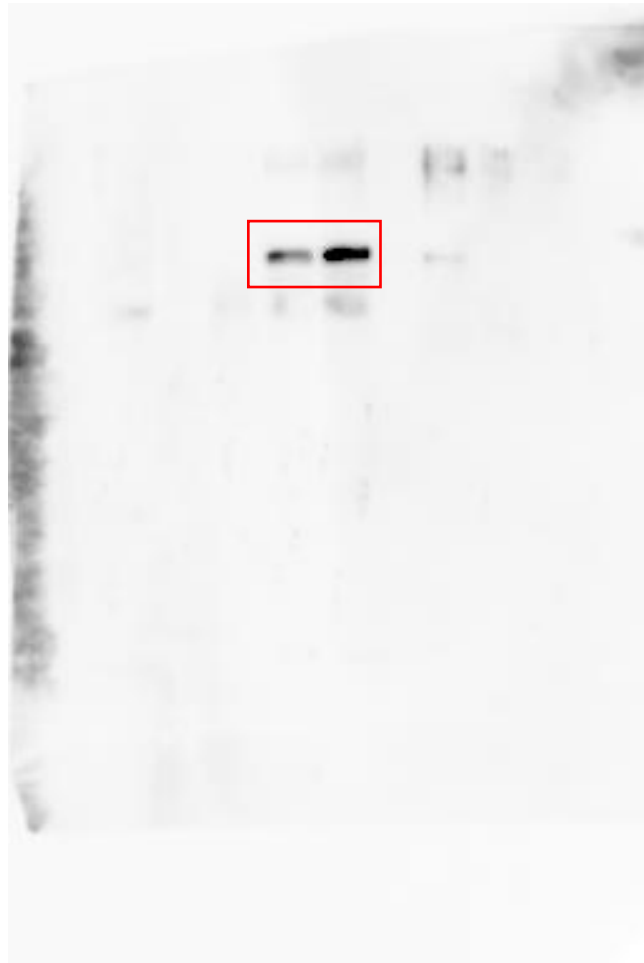

ACTB

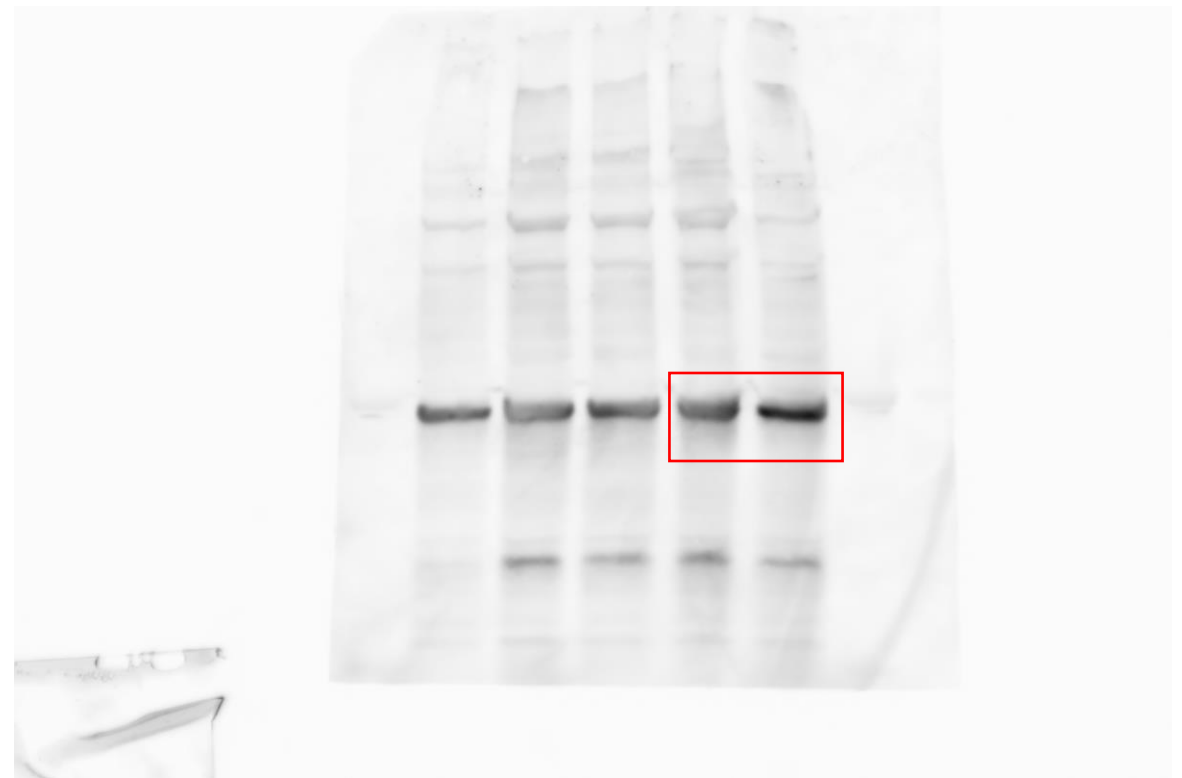

Figure 5f

Rac1-GTP

Total Rac1

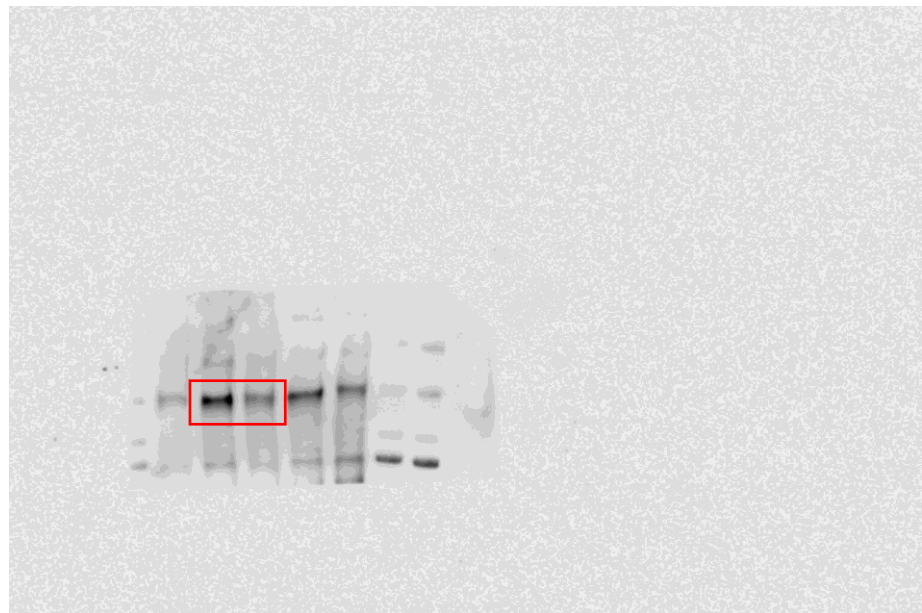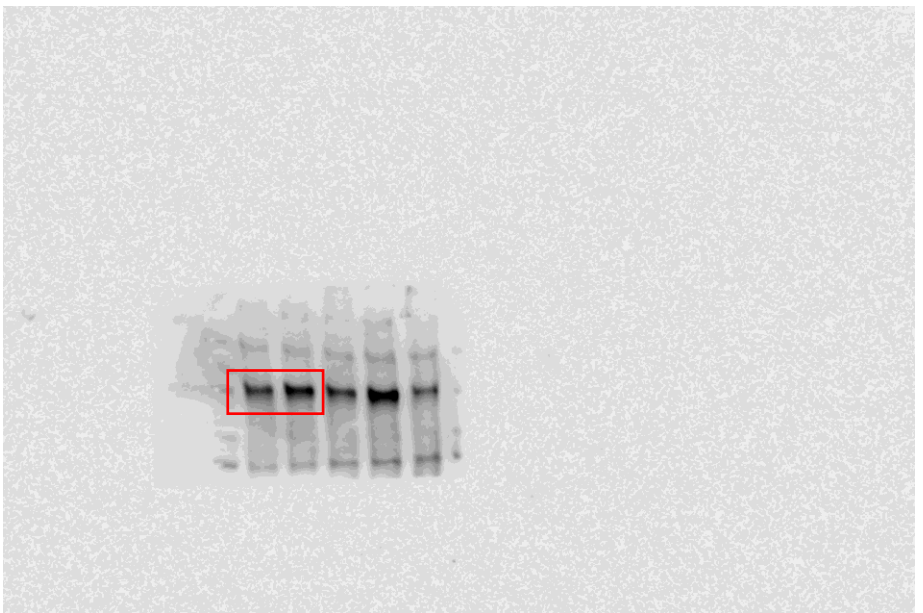

ACTB

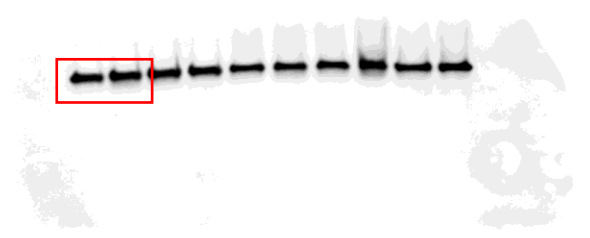

Supplement: 41598_2024_78395_MOESM1_ESM.pdf [file 41598_2024_78395_MOESM1_ESM.pdf]
